# Supplementary material for: Thioredoxin-A is a virulence factor and mediator of the type IV pilus system in Acinetobacter baumannii
Source: PubMed Central journal article supplement (PMC6605650; doi:10.1371/journal.pone.0218505), 2019-07-02
Supplement: pone.0218505.s002.pdf [file pone.0218505.s002.pdf]

|                                | <b>Ci79 (WT)</b> | <b><math>\Delta</math>trxA</b> | <b>Comp</b> |
|--------------------------------|------------------|--------------------------------|-------------|
| <b>Amikacin</b>                | >32 R            | >32 R                          | >32 R       |
| <b>Amoxicillin-Clavulanate</b> | R                | R                              | R           |
| <b>Ampicillin</b>              | R                | R                              | R           |
| <b>Aztreonam</b>               | 8 R              | >16 R                          | >16 R       |
| <b>Cefazolin</b>               | R                | R                              | R           |
| <b>Cefepime</b>                | 16 I             | >16 R                          | >16 R       |
| <b>Ceftazidime</b>             | 16 I             | >16 R                          | 16 I        |
| <b>Ceftriaxone</b>             | >32 R            | >32 R                          | >32 R       |
| <b>Ciprofloxacin</b>           | >2 R             | >2 R                           | >2 R        |
| <b>Ertapenem</b>               | R                | R                              | R           |
| <b>Gentamicin</b>              | >8 R             | >8 R                           | >8 R        |
| <b>Imipenem</b>                | >8 R             | >8 R                           | >8 R        |
| <b>Levofloxacin</b>            | >4 R             | >4 R                           | >4 R        |
| <b>Nitrofurantoin</b>          | R                | R                              | R           |
| <b>Tetracycline</b>            | >8 R             | >8 R                           | >8 R        |
| <b>Tobramycin</b>              | >8 R             | >8 R                           | >8 R        |

**Supplemental 2 Table. Antimicrobial susceptibility.** Bacteria were grown overnight at 37 °C from frozen stock on a tryptic soy agar (TSA) slants. The drug susceptibility assay was ran on a BD Phoenix using a NMIC/ID-304 susceptibility panel. If available, maximum MIC is shown in  $\mu$ g/mL. R= resistant, I = intermediate.
