# Supplementary material for: Thioredoxin-A is a virulence factor and mediator of the type IV pilus system in Acinetobacter baumannii
Source: PubMed Central journal article supplement (PMC6605650; doi:10.1371/journal.pone.0218505), 2019-07-02
Supplement: pone.0218505.s003.pdf [file pone.0218505.s003.pdf]

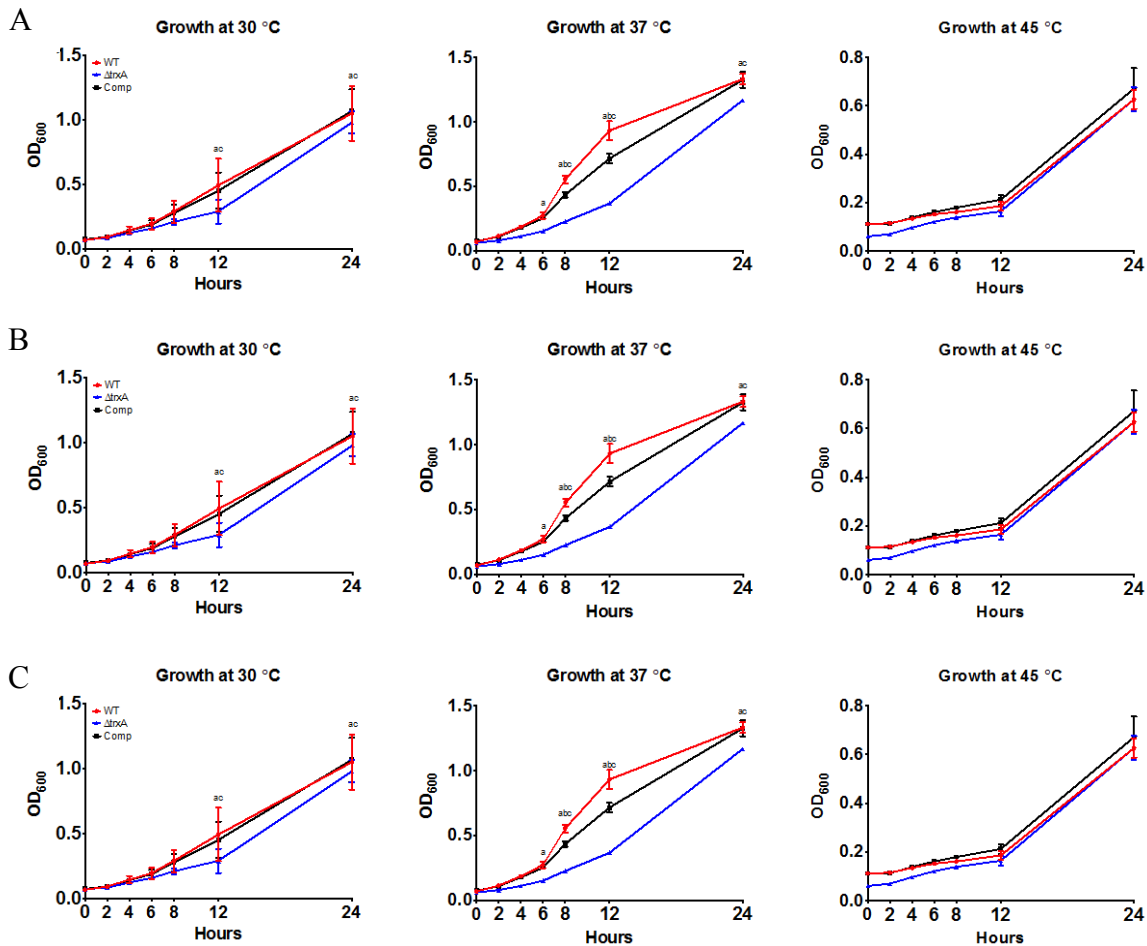

**Supplemental 1 Fig. The effect of temperature, salt concentration, and pH on growth of wild type (Ci79), *trxA* mutant, and complemented bacterial strains.** Growth curve of bacteria grown in (A) varying temperatures or the absence and presence of (B) NaCl or (C) varying pH. Representative of 3 independent experiments, N=6. a = significant between group 1&2, b = significant between groups 1&3, c = significant between groups 2&3. Statistical differences were determined by two-way ANOVA with Holm-Sidak correction ( $P < 0.05$ ).
